# Supplementary material for: Exploring the reliability of inpatient EMR algorithms for diabetes identification
Source: PubMed Central journal article supplement — BMJ Health Care Inform. 2023 Dec 20;30(1):e100894. doi: 10.1136/bmjhci-2023-100894 (PMC10749029; doi:10.1136/bmjhci-2023-100894), 2023-12-20
Supplement: bmjhci-2023-100894supp003.pdf [file bmjhci-2023-100894supp003.pdf]

**Appendix Table 2.** Grid Search Space and Best Hyperparameters of XGBoost Model.

| Factor              | Value                  |
|---------------------|------------------------|
| Lambda              | 0, 0.3, 0.5, 0.7, 1    |
| Alpha               | 0, 0.5, 1              |
| Learning Rate       | 0.01, 0.03, 0.05, 0.10 |
| Objective           | Binary: logistic       |
| Max Depth           | 1,3,5,7                |
| Min Child Weight    | 1,3,5                  |
| Subsample           | 0.5, 0.7, 1            |
| Colsample           | 0.7                    |
| Best Hyperparameter |                        |
| Factor              | Value                  |
| Lambda              | 0.7                    |
| Alpha               | 0.5                    |
| Learning Rate       | 0.03                   |
| Objective           | Binary: logistic       |
| Max Depth           | 3                      |
| Min Child Weight    | 1                      |
| Subsample           | 1                      |
