# Supplementary material for: Exploring the reliability of inpatient EMR algorithms for diabetes identification
Source: PubMed Central journal article supplement — BMJ Health Care Inform. 2023 Dec 20;30(1):e100894. doi: 10.1136/bmjhci-2023-100894 (PMC10749029; doi:10.1136/bmjhci-2023-100894), 2023-12-20
Supplement: bmjhci-2023-100894supp004.pdf [file bmjhci-2023-100894supp004.pdf]

**Appendix Table 3.** Confusion Matrix for the Free-text XGBoost Algorithm on the Testing Dataset (n=609).

|               | Predicted Positive | Predicted Negative |
|---------------|--------------------|--------------------|
| True Positive | 111                | 6                  |
| True Negative | 7                  | 485                |
