# Supplementary figures and images for: Exploring the reliability of inpatient EMR algorithms for diabetes identification
Source: HighWire-hosted journal article supplement (doi:10.1136/bmjhci-2023-100894), 2023-12-01

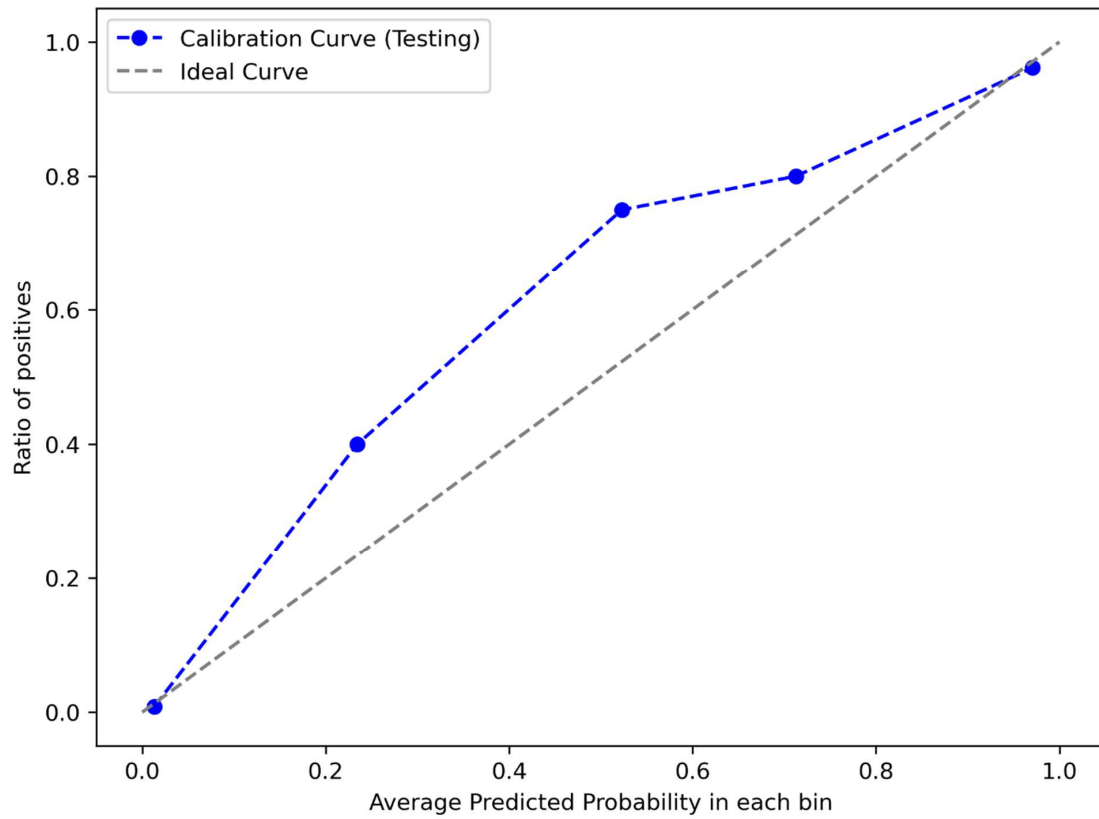

Supplement: bmjhci-2023-100894supp002_data_supplement.pdf [file bmjhci-2023-100894supp002_data_supplement.pdf]
